# Supplementary material for: Efficiency of Cytokine-Induced Killer Cells in Combination with Chemotherapy for Triple-Negative Breast Cancer
Source: PubMed Central journal article supplement — J Breast Cancer. 2018 Jun 20;21(2):150–7. doi: 10.4048/jbc.2018.21.2.150 (PMC6015982; doi:10.4048/jbc.2018.21.2.150), 2018-06-20
Supplement: jbc-21-150-s002.pdf [file jbc-21-150-s002.pdf]

**Supplementary Table 2.** The data of CIK cell immunotherapy cycles

| CIK cell immunotherapy cycles | No. of patients (%) |
|-------------------------------|---------------------|
| 1                             | 2 (2.6)             |
| 2                             | 3 (3.8)             |
| 3                             | 4 (5.2)             |
| 4                             | 13 (16.9)           |
| 5                             | 15 (19.5)           |
| 6                             | 7 (9.1)             |
| 7                             | 7 (9.1)             |
| 8                             | 5 (6.5)             |
| 9                             | 5 (6.5)             |
| 11                            | 4 (5.2)             |
| 12                            | 4 (5.2)             |
| 13                            | 2 (2.6)             |
| 15                            | 2 (2.6)             |
| 17                            | 1 (1.3)             |
| 18                            | 1 (1.3)             |
| 19                            | 2 (2.6)             |

CIK = cytokine-induced killer.
